# Supplementary material for: Extent of intramolecular cyclization in RAFT-synthesized methacrylic branched copolymers using 13C NMR spectroscopy
Source: Royal Society of Chemistry journal article supplement (doi:10.1039/c4py01441c), 2014-11-10
Supplement: c4py01441c1.pdf [file c4py01441c1.pdf]

## Supporting Information for *Polymer Chemistry* manuscript:

### Extent of intramolecular cyclization in RAFT-synthesized methacrylic branched copolymers using $^{13}\text{C}$ NMR spectroscopy

J. Rosselgong and S. P. Armes\*

*Department of Chemistry, University of Sheffield,  
Brook Hill, Sheffield, South Yorkshire, S3 7HF, UK.*

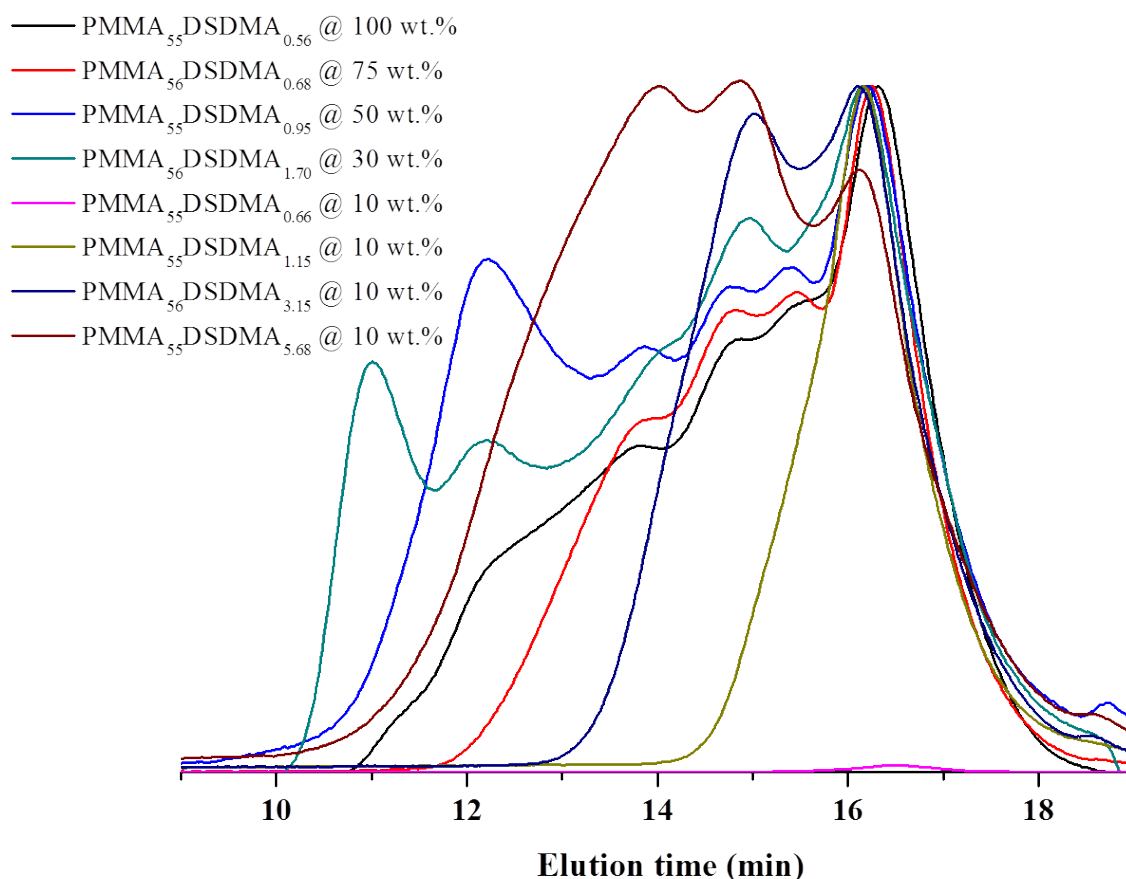

**Figure S1.** DMF GPC traces recorded for a series of seven PMMA<sub>(55-56)</sub>-DSDMA<sub>x</sub> branched copolymers (see Table 1 in the main text) using a refractive index detector (calibration achieved via a series of near-monodisperse poly(methyl methacrylate) standards).
